# Supplementary figures and images for: Oral Vaccination of Largemouth Bass (Micropterus salmoides) against Largemouth Bass Ranavirus (LMBV) Using Yeast Surface Display Technology
Source: MDPI journal article supplement (doi:10.3390/ani13071183), 2023-03-28

Figure S1

Vaccination/challenge and sampling schedule.

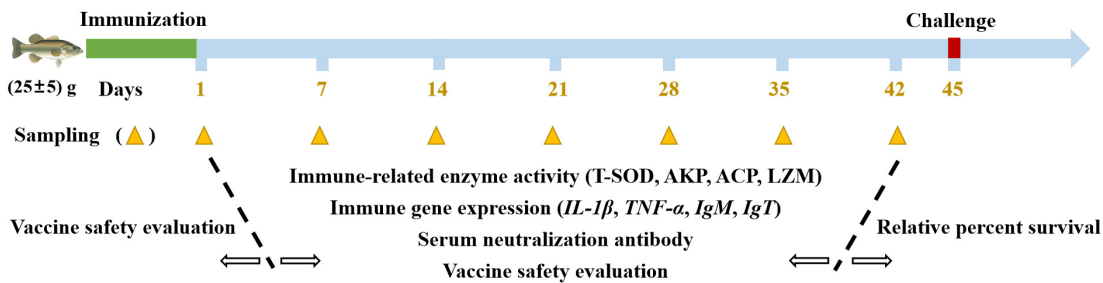

Supplement: s1 [file s1]
